# Supplementary material for: The Pangenome of the Anticarsia gemmatalis Multiple Nucleopolyhedrovirus (AgMNPV)
Source: PubMed Central journal article supplement — Genome Biol Evol. 2015 Nov 27;8(1):94–108. doi: 10.1093/gbe/evv231 (PMC4758234; doi:10.1093/gbe/evv231), 2015-11-27
Supplement: supp_evv231_Additional_File_1.pdf [file supp_evv231_Additional_File_1.pdf]

SUPPLEMENTARY FIGURES

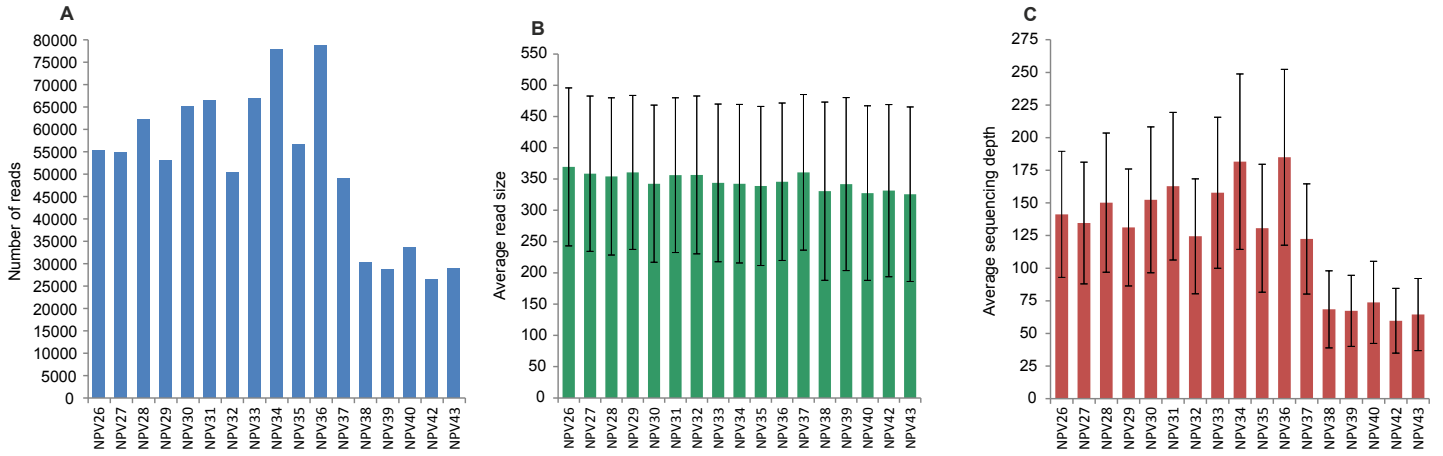

**Supplementary Figure 1.** Features of sequence datasets of AgMNPV. A) Total number of reads per sample. B) Average read sizes. C) Average sequencing depth.

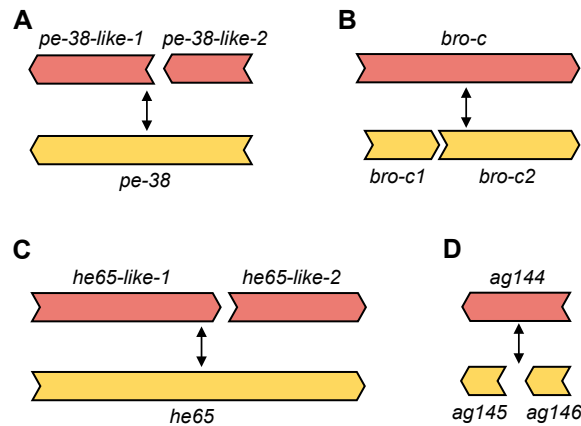

**Supplementary Figure 2.** Examples of AgMNPV genes that evolve via gene fission/fusion: A) pe-38; B) bro-c; C) he65; and D) ag144. Red arrows represent ORFs previously annotated in the genome of AgMNPV-2D, and yellow ones are new ORFs derived from events of fission/fusion.

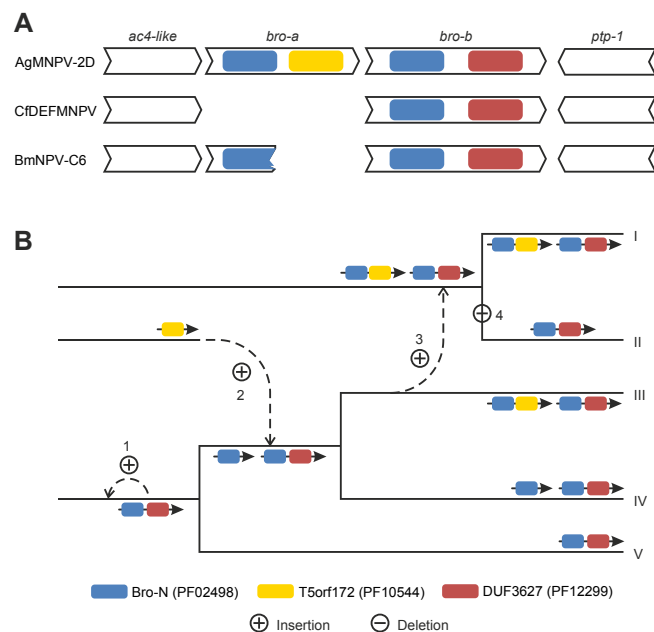

**Supplementary Figure 3.** Structural variations and hypothetical mechanisms outlining the evolution of the haplotype of bro-a. A) Homologs of the haplotype bro-a/bro-b and its neighbouring genes. B) Hypothetical evolutionary relationships among different haplotypes containing bro genes. Events of partial duplication (+), horizontal transfer (+), and deletion (-), numbered from 1 to 4 depict those hypotheses discussed in the text. Taxa I and III have the same gene content as the haplotype bro-a/bro-b, and their evolutionary history could explain the origin of this haplotype in AgMNPV-2D. The taxon V illustrates a haplotype that never had homologs of bro-a and bro-b next to each in the genome, while taxon II illustrates a haplotype that lost a homolog of bro-a, similarly to what likely happened with some AgMNPV genotypes. Taxon IV has a haplotype similar to that one observed in BmNPV-C6. The scenario in IV could represent both a haplotype that has two DUF3627 domains as result of duplication, or a haplotype that lost a T5orf172 domain.
