# Supplementary material for: The Pangenome of the Anticarsia gemmatalis Multiple Nucleopolyhedrovirus (AgMNPV)
Source: PubMed Central journal article supplement — Genome Biol Evol. 2015 Nov 27;8(1):94–108. doi: 10.1093/gbe/evv231 (PMC4758234; doi:10.1093/gbe/evv231), 2015-11-27
Supplement: supp_evv231_Additional_File_2.pdf [file supp_evv231_Additional_File_2.pdf]

## SUPPLEMENTARY TABLES

**Supplementary Table 1.** Occurrence of variable ORFs observed in the metapopulation of AgMNPV. ORFs conserved in all AgMNPV genomes are not represented below.

| ORF    | Gene                | 2D | 26 | 27 | 28 | 29 | 30 | 31 | 32 | 33 | 34 | 35 | 36 | 37 | 38 | 39 | 40 | 42 | 43 |
|--------|---------------------|----|----|----|----|----|----|----|----|----|----|----|----|----|----|----|----|----|----|
| ORF005 | <i>pe38</i>         |    | +  | +  | +  | +  | +  | +  | +  | +  | +  | +  | +  | +  | +  | +  | +  | +  | +  |
| ORF006 | <i>pe-38-like-1</i> | +  | -  | -  | -  | -  | -  | -  | -  | -  | -  | -  | -  | -  | -  | -  | -  | -  | -  |
| ORF007 | <i>pe-38-like-2</i> | +  | -  | -  | -  | -  | -  | -  | -  | -  | -  | -  | -  | -  | -  | -  | -  | -  | -  |
| ORF008 | <i>ag8</i>          | -  | -  | +  | -  | +  | -  | +  | -  | -  | -  | +  | -  | -  | -  | -  | +  | +  | +  |
| ORF012 | <i>ag12</i>         | -  | -  | -  | -  | -  | -  | -  | -  | +  | -  | -  | -  | -  | -  | -  | -  | +  | -  |
| ORF059 | <i>he65</i>         | -  | +  | +  | +  | +  | +  | +  | +  | +  | +  | +  | +  | +  | +  | -  | +  | +  | -  |
| ORF060 | <i>he65-like-1</i>  | +  | -  | -  | -  | -  | -  | -  | -  | -  | -  | -  | -  | -  | -  | +  | -  | -  | +  |
| ORF061 | <i>he65-like-2</i>  | +  | -  | -  | -  | -  | -  | -  | -  | -  | -  | -  | -  | -  | -  | +  | -  | -  | +  |
| ORF139 | <i>rnf12-like</i>   | -  | +  | +  | +  | +  | +  | +  | -  | +  | +  | +  | +  | +  | +  | +  | +  | +  | +  |
| ORF144 | <i>ag144</i>        | +  | -  | -  | -  | -  | -  | -  | -  | -  | -  | -  | +  | +  | -  | -  | -  | -  | -  |
| ORF145 | <i>ag145</i>        | -  | +  | +  | +  | +  | +  | +  | +  | +  | +  | +  | -  | -  | +  | +  | +  | +  | +  |
| ORF146 | <i>ag146</i>        | -  | +  | +  | +  | +  | +  | +  | +  | +  | +  | +  | -  | -  | +  | +  | +  | -  | +  |
| ORF156 | <i>bro-c</i>        | +  | +  | +  | +  | +  | +  | +  | -  | +  | +  | -  | -  | +  | +  | +  | +  | +  | +  |
| ORF157 | <i>bro-c1</i>       | -  | -  | -  | -  | -  | -  | -  | +  | -  | -  | +  | +  | -  | -  | -  | -  | -  | -  |
| ORF158 | <i>bro-c2</i>       | -  | -  | -  | -  | -  | -  | -  | +  | -  | -  | +  | +  | -  | -  | -  | -  | -  | -  |
| ORF163 | <i>bro-a</i>        | +  | +  | -  | -  | -  | -  | +  | -  | -  | -  | +  | -  | -  | -  | -  | +  | -  | +  |

\* Coding sequence observed as a disrupted gene.

**Supplementary Table 2.** Presence/absence matrix of 11 *homologous regions (hrs)* and 14 *direct repeats (drs)* observed in the metapopulation of AgMNPV. *hrs/drs* highlighted in bold are absent in some AgMNPV genomes. CNVs stand for the total of ‘Copy Number Variants’ found for each repetitive region. Values assigned for *hrs* and *drs* represent the number of core palindromes and repeat units, respectively.

| ID          | CNVs | 2D      | 26      | 27      | 28      | 29      | 30      | 31      | 32      | 33      | 34      | 35      | 36      | 37      | 38      | 39      | 40      | 42      | 43      |        |
|-------------|------|---------|---------|---------|---------|---------|---------|---------|---------|---------|---------|---------|---------|---------|---------|---------|---------|---------|---------|--------|
| <b>hr1</b>  | 1    | -       | -       | 1 x 30  | 1 x 30  | 1 x 30  | -       | 1 x 30  | -       | -       | 1 x 30  | 1 x 30  | -       | -       | -       | -       | 1 x 30  | 1 x 30  | 1 x 30  |        |
| <i>hr2</i>  | 1    | 1 x 30  | 1 x 30 |
| <i>hr3</i>  | 4    | 19 x 30 | 7 x 30  | 9 x 30  | 5 x 30  | 5 x 30  | 5 x 30  | 9 x 30  | 9 x 30  | 7 x 30  | 7 x 30  | 9 x 30  | 9 x 30  | 9 x 30  | 5 x 30  | 9 x 30 |
| <i>hr4</i>  | 1    | 3 x 30  | 3 x 30 |
| <i>hr5</i>  | 1    | 5 x 30  | 5 x 30 |
| <i>hr6</i>  | 1    | 3 x 30  | 3 x 30 |
| <i>hr7</i>  | 1    | 1 x 30  | 1 x 30 |
| <i>hr8</i>  | 1    | 3 x 30  | 3 x 30 |
| <i>hr9</i>  | 2    | 4 x 30  | 8 x 30 |
| <i>hr10</i> | 2    | 5 x 30  | 4 x 30  | 5 x 30  | 4 x 30 |
| <i>hr11</i> | 2    | 7 x 30  | 7 x 30  | 4 x 30  | 7 x 30  | 4 x 30  | 7 x 30 |
| <b>dr1</b>  | 2    | 2 x 15  | 2 x 15  | 3 x 15  | 2 x 15  | 2 x 15  | 2 x 15  | 2 x 15  | 3 x 15  | 3 x 15  | 2 x 15  | 3 x 15  | 3 x 15  | -       |        |
| <b>dr2</b>  | 2    | -       | -       | 3 x 30  | 2 x 30  | 3 x 30  | 2 x 30  | 3 x 30  | 3 x 30  | -       | -       | -       | -       | 3 x 30  | 2 x 30  | -       | 3 x 30  | 3 x 30  | -       |        |
| <b>dr3</b>  | 2    | 10 x 21 | 10 x 21 | -       | -       | -       | 10 x 21 | -       | 10 x 21 | 4 x 21  | -       | -       | 10 x 21 | 10 x 21 | 10 x 21 | 4 x 21  | -       | -       | -       |        |
| <i>dr4</i>  | 6    | 33 x 14 | 26 x 14 | 36 x 14 | 34 x 14 | 26 x 14 | 32 x 14 | 32 x 14 | 28 x 14 | 26 x 14 | 26 x 14 | 26 x 14 | 33 x 14 | 26 x 14 |        |
| <i>dr5</i>  | 1    | 2 x 18  | 2 x 18 |
| <i>dr6</i>  | 5    | 3 x 24  | 11 x 24 | 13 x 24 | 9 x 24  | 9 x 24  | 9 x 24  | 11 x 24 | 12 x 24 | 11 x 24 | 13 x 24 | 11 x 24 | 11 x 24 | 13 x 24 | 9 x 24  | 12 x 24 | 12 x 24 | 13 x 24 | 11 x 24 |        |
| <i>dr7</i>  | 2    | 4 x 30  | 3 x 30  | 4 x 30  | 4 x 30  | 4 x 30  |        |
| <i>dr8</i>  | 2    | 3 x 24  | 3 x 25  | 3 x 24  |        |
| <i>dr9</i>  | 2    | 5 x 24  | 4 x 24  | 5 x 24  |        |
| <i>dr10</i> | 1    | 2 x 15  |        |
| <i>dr11</i> | 1    | 2 x 28  |        |
| <i>dr12</i> | 1    | 2 x 21  |        |
| <b>dr13</b> | 1    | -       | 4 x 15  | -       | 4 x 15  | -       | 4 x 15  | 4 x 15  | -       | 4 x 15  |        |
| <b>dr14</b> | 1    | 2 x 19  | -       | -       | -       | -       | -       | -       | -       | -       | -       | -       | -       | 2 x 19  | -       | -       | -       | 2 x 19  | -       |        |
